# Supplementary material
Source: Springer Nature journal article supplement (https://www.springermedizin.de/resource/supplementary/12997_2008_34_MOESM1_ESM.pdf/9623174)

**Figure 1 A**

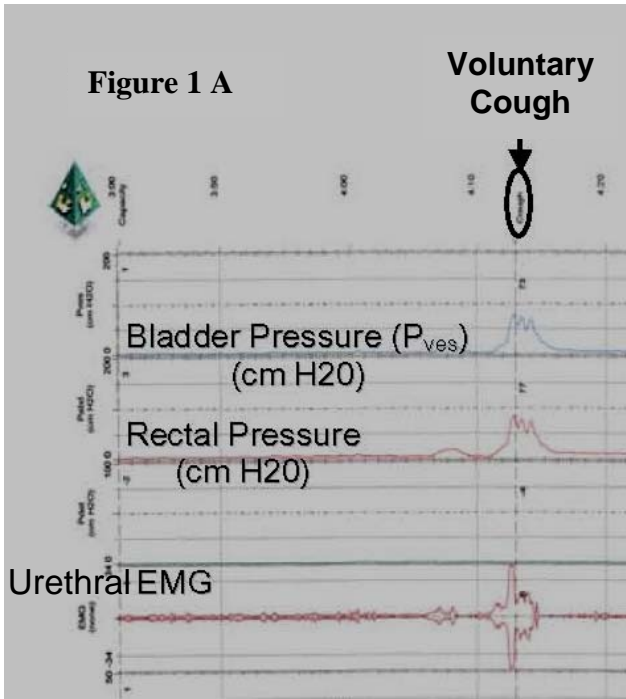

Urethral EMG

**Figure 1 B**

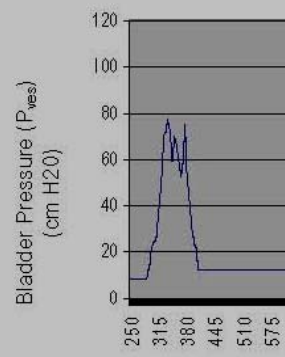

**RCT**

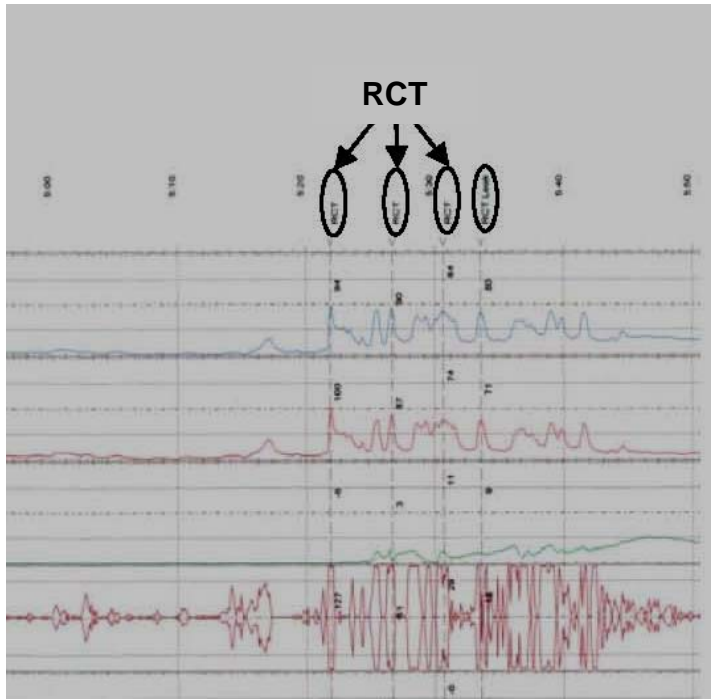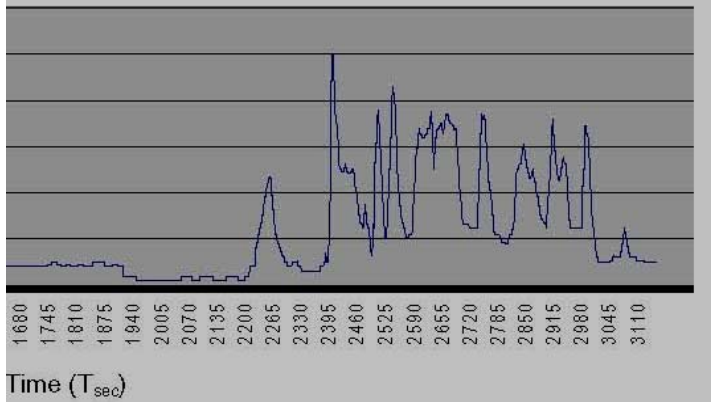

Supplement: MOESM1 [file 9623174]
